# Supplementary material for: Identification and functional analysis of promoters of heat-shock genes from the fall armyworm, Spodoptera frugiperda
Source: PubMed Central journal article supplement (PMC7012861; doi:10.1038/s41598-020-59197-8), 2020-02-11
Supplement: 41598_2020_59197_MOESM1_ESM.pdf [file 41598_2020_59197_MOESM1_ESM.pdf]

## **Identification and functional analysis of heat-shock promoters from *Spodoptera frugiperda***

Xien Chen <sup>a</sup>, Anjiang Tan <sup>b</sup>, Subba Reddy Palli <sup>a, \*</sup>

<sup>a</sup> *Department of Entomology, College of Agriculture, Food and Environment, University of Kentucky, Lexington, KY 40546, United States of America*

<sup>b</sup> *Key Laboratory of Insect Developmental and Evolutionary Biology, Center for Excellence in Molecular Plant Sciences, Shanghai Institute of Plant Physiology and Ecology, Chinese Academy of Sciences, Shanghai, 200032, China.*

\* Corresponding author. E-mail address: [rpalli@uky.edu](mailto:rpalli@uky.edu)

**Table S1** Accession of *SfHsp* sequences on NCBI.

| Sequence                 | Accession number |
|--------------------------|------------------|
| <i>SfHsp11.2</i>         | MN735761         |
| <i>SfHsp15.82</i>        | MN735762         |
| <i>SfHsp19.07</i>        | MN735763         |
| <i>SfHsp19.35</i>        | MN735764         |
| <i>SfHsp19.66</i>        | MN735765         |
| <i>SfHsp19.74</i>        | MN735766         |
| <i>SfHsp20.15</i>        | MN735767         |
| <i>SfHsp20.71</i>        | MN735768         |
| <i>SfHsp21.37</i>        | MN735769         |
| <i>SfHsp21.38</i>        | MN735770         |
| <i>SfHsp21.96</i>        | MN735771         |
| <i>SfHsp24.35</i>        | MN735772         |
| <i>SfHsp26.61</i>        | MN735773         |
| <i>SfHsp29.00</i>        | MN735774         |
| <i>SfHsp60</i>           | MN735775         |
| <i>SfHsp70A</i>          | MN735776         |
| <i>SfHsp70B</i>          | MN735777         |
| <i>SfHsp70C</i>          | MN735778         |
| <i>SfHsp70D</i>          | MN735779         |
| <i>SfHsp75</i>           | MN735780         |
| <i>SfHsp83</i>           | MN735781         |
| <i>SfHsp97</i>           | MN735782         |
| <i>SfHsp19.07</i> -P790  | MN735783         |
| <i>SfHsp19.74</i> -P1385 | MN735784         |
| <i>SfHsp20.15</i> -P872  | MN735785         |
| <i>SfHsp20.71</i> -P1638 | MN735786         |
| <i>SfHsp21.37</i> -P1369 | MN735787         |
| <i>SfHsp29.00</i> -P499  | MN735788         |
| <i>SfHsp70A</i> -P1218   | MN735789         |
| <i>SfHsp70D</i> -P1403   | MN735790         |

**Table S2** Primers used in this study.

| Primers       | Sequence (5'-3')      | Purpose |
|---------------|-----------------------|---------|
| SfHsp11.2-QF  | AGGGCTGAAGCAGTAACCAA  | qPCR    |
| SfHsp11.2-QR  | TCGCTCTCTCGGAATAGGTG  | qPCR    |
| SfHsp15.82-QF | GTGCACGACTATGCTCCTGA  | qPCR    |
| SfHsp15.82-QR | TGCGAGGAACAGAGATGATG  | qPCR    |
| SfHsp19.07-QF | CCC GTTCTTCAGAGATCCAG | qPCR    |
| SfHsp19.07-QR | ACCGTGATCTCGTTTCCAAC  | qPCR    |
| SfHsp19.35-QF | GGACCAGAACTTCGGACTGA  | qPCR    |
| SfHsp19.35-QR | TGGCCTTCAACCACAATGTA  | qPCR    |
| SfHsp19.66-QF | TTGCCTGAAGGGTGTATTCC  | qPCR    |
| SfHsp19.66-QR | ACTTCGGTTTTTCGTGGTTTG | qPCR    |
| SfHsp19.74-QF | GGGTATATTTCCCGCCAGTT  | qPCR    |
| SfHsp19.74-QR | CTGGTCCTTGACTTCCTTGC  | qPCR    |
| SfHsp20.15-QF | CCGCAAGACCAGTTAACCAT  | qPCR    |
| SfHsp20.15-QR | GATGAATCCGTGCTGATCCT  | qPCR    |
| SfHsp20.71-QF | AGCCAAGCATGAGGAGAAGA  | qPCR    |
| SfHsp20.71-QR | CTGGTCCTTGATCTCCTTGC  | qPCR    |
| SfHsp21.37-QF | CCTTTTGTTCTCGGCTACGA  | qPCR    |
| SfHsp21.37-QR | ATCCTTGTCGGACTTGATGC  | qPCR    |
| SfHsp21.38-QF | CGACACTGAATTCTCCAGCA  | qPCR    |
| SfHsp21.38-QR | CACTGTGCTGTGACGATGTG  | qPCR    |
| SfHsp21.96-QF | CGAGGAGAAACAGGATGAGC  | qPCR    |
| SfHsp21.96-QR | CTGTCTTGGTGATGGGGACT  | qPCR    |
| SfHsp24.35-QF | GCTGACATTGGACCCAGAAT  | qPCR    |
| SfHsp24.35-QR | CTCGAGGAGTTGGCTGGTAG  | qPCR    |
| SfHsp26.61-QF | GGTGTTCGACAAGGGAGTGT  | qPCR    |
| SfHsp26.61-QR | TGGCTTTGTCTTGGTCTCCT  | qPCR    |
| SfHsp29.00-QF | GAGGAAGTCCTGGAGGAACC  | qPCR    |
| SfHsp29.00-QR | GGTCACTTCTTCCTGCTTGC  | qPCR    |
| SfHsp75-QF    | AGACAGACAGGCCTCTGGAA  | qPCR    |
| SfHsp75-QR    | TGCCCTGCTTTTTGATCTCT  | qPCR    |
| SfHsp83-QF    | GAAGCGCAAGAACAACATCA  | qPCR    |
| SfHsp83-QR    | TTCTGTTGGAGCATCTCACG  | qPCR    |
| SfHsp97-QF    | TGAGAACAGAAGGCGAACCT  | qPCR    |
| SfHsp97-QR    | GCCTCTGCCACTTTCTGAAC  | qPCR    |
| SfHsp70A/B-QF | GTGGCTATGGAGGAAACCAG  | qPCR    |
| SfHsp70A/B-QR | CGCACATTTTCTCTGTTGA   | qPCR    |
| SfHsp70C-QF   | GGCCAACTGTGGAAGAAGTC  | qPCR    |
| SfHsp70C-QR   | TGTGGGTGTGTTAGCGTTTG  | qPCR    |
| SfHsp70D-QF   | CAAGCAAGCGAAGAGAAGAGA | qPCR    |

|                   |                            |               |
|-------------------|----------------------------|---------------|
| SfHsp70D-QR       | CACACGAGTAGGTCGTTCCA       | qPCR          |
| SfHSP70A-P1218F   | ATCGGGGTACCCACCTACACAC     | Promoter      |
| SfHSP70A-P1218R   | AGTTCGAATATTGC             | amplification |
| SfHSP70D-P1403F   | CCATGCCATGGTTTGTCTT        | Promoter      |
| SfHSP70D-P1403R   | CAGATTCTCTTCAC             | amplification |
| SfHSP19.07-P790F  | ATCGGGGTACCAACTCAATAAC     | Promoter      |
| SfHSP19.07-P790R  | CGGTTGGGTAAGC              | amplification |
| SfHSP19.74-P1385F | CCATGCCATGGTTTTCTTGATTA    | Promoter      |
| SfHSP19.74-P1385R | TATTTCTCTTTATTAC           | amplification |
| SfHSP20.15-P872F  | ATCGGGGTACCAGTTAATAGTCA    | Promoter      |
| SfHSP20.15-P872R  | CCTACACTCGGAAG             | amplification |
| SfHSP20.71-P1638F | CCATGCCATGGTTTGGTCGTTTTG   | Promoter      |
| SfHSP20.71-P1638R | TTTATTTCGTTG               | amplification |
| SfHSP21.37-P1369F | ATCGGGGTACCTTCTGCATAGTCT   | Promoter      |
| SfHSP21.37-P1369R | ATGGATATCGG                | amplification |
| SfHSP29.00-P499F  | CCATGCCATGGTTTTCTTATTTTCG  | Promoter      |
| SfHSP29.00-P499R  | TTTTCAACTGAC               | amplification |
| ie1-F             | ATCGGGGTACCTACTGGATGTATCT  | Promoter      |
| ie1-R             | AGAGTGCTCC                 | amplification |
| ie2-F             | CCATGCCATGGCTTCACTGGATAAT  | Promoter      |
| ie2-R             | ACTGATAATC                 | amplification |
| hr5/ie1-F         | ATCGGGGTACCAACACTGACATGAA  | Promoter      |
| hr5/ie1-R         | GACACATGG                  | amplification |
|                   | ATCCCAAGCTTTTTGCTTGATTCTAA | Promoter      |
|                   | CACAACAAC                  | amplification |
|                   | ATCGGGGTACCACATACATTTCAAAG | Promoter      |
|                   | TAAGTCACG                  | amplification |
|                   | CCATGCCATGGTTTGTGAGTGTTGA  | Promoter      |
|                   | GTATTCTTC                  | amplification |
|                   | ATCGGGTACCGAGTAGAGTAACCTCT | Promoter      |
|                   | ACTCTCC                    | amplification |
|                   | CCATGCCATGGCGTTCGTTGCG     | Promoter      |
|                   | TTGTTGTTGCTTTC             | amplification |
|                   | ATCGGGGTACCCGATGTCTTTG     | Promoter      |
|                   | TGATGCGCGCGAC              | amplification |
|                   | CCATGCCATGGCTTGGTTGTTCA    | Promoter      |
|                   | CGATCTTGTCG                | amplification |
|                   | ATCGGGGTACCCATGATGATAAA    | Promoter      |
|                   | CAATGTATGG                 | amplification |
|                   | CCATGCCATGGAACAGATGCTGT    | Promoter      |
|                   | TCAACTGTGT                 | amplification |
|                   | ATCGGGGTACCCATTGCTTGTCAT   | Promoter      |
|                   | TTATTAATTTGG               | amplification |
|                   | CCATGCCATGGCTTGGTTGTTTAC   | Promoter      |
|                   | GATCTTGTCG                 | amplification |



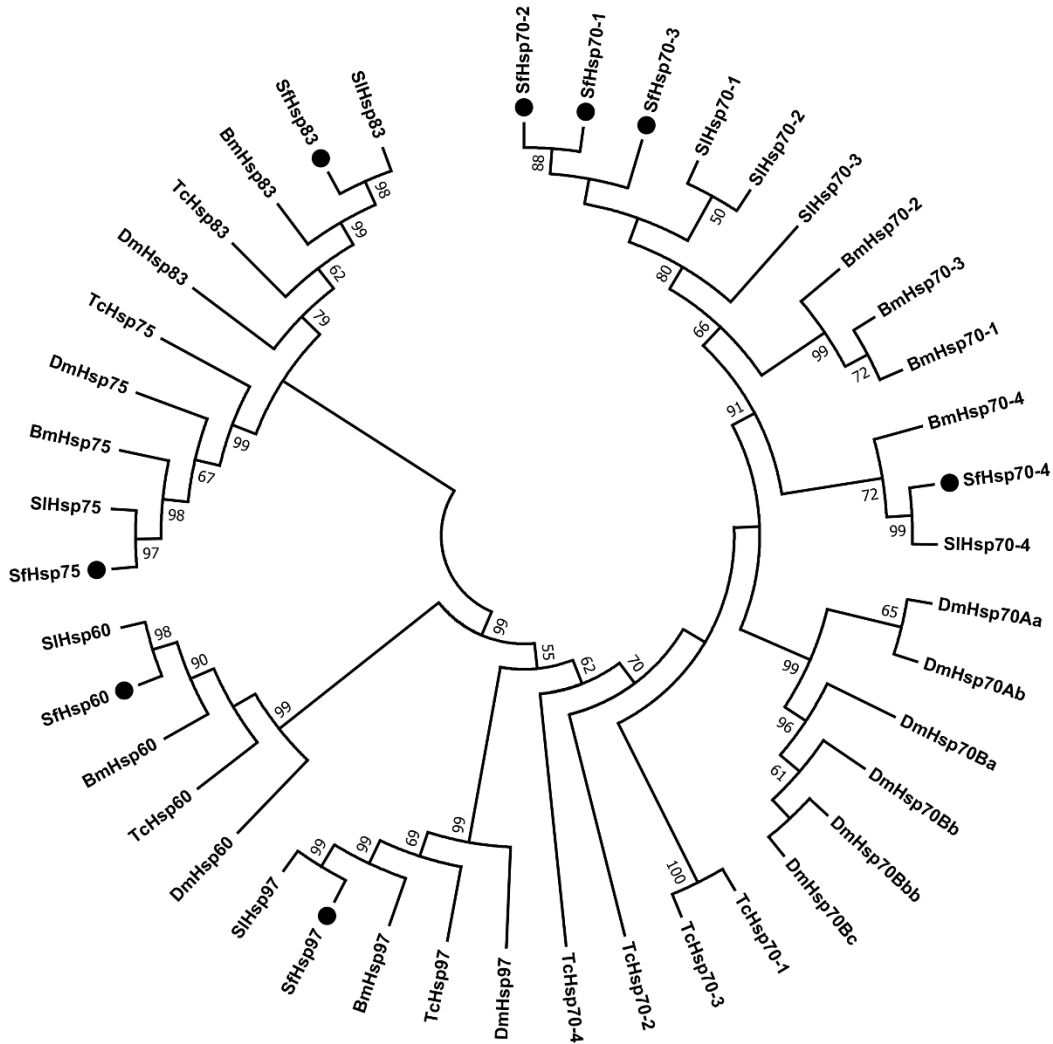

Figure S2. Phylogenetic analysis of insect Hsp60, Hsp70, Hsp75, Hsp83, and Hsp90. Amino acid sequences of Hsp60, Hsp70, Hsp75, Hsp83, and Hsp90 from *B. mori* (Bm), *Danaus plexippus* (Dp), *P. xylostella* (Px), *S. frugiperda* (Sf), and *S. litura* (Sl) were obtained from the non-redundant database on NCBI. The phylogenetic tree was established using MEGA7 (<https://www.megasoftware.net>) by the neighbor-joining method with a bootstrap test of 1,000 replicates. Only percentage bootstrap values over 50 are indicated on the nodes of the tree. The *S. frugiperda* Hsp are labeled with black dots.

CTGGATATGGCAATCGAGACGTCTAGCCAGTAAAAGATAAACCTAATGGGTATTTTTTTGGTATAAGCTAGTGAACGAGCAGGCAATTTTT  
 TTTGTAAATGTGTAAACTAAACACTGACATGAAGACACATGGTAAACATATTTATTTTTCCAGAAATAACTAACAGCTGATAGTGATTCAGCT  
 ACAAATCGTATTGTTTACAATGTAGGTTAGTAGATAAAGGTGATAATTGGTATTACCCGTCAGTTAAATCATCAAGAAATATTATATCGCTA  
 GGTATTTTTAATGTTTATTGATAAAAAATAACAAATAATATAAGTAAGTATTTTAATTAAGACTAAACCATATTCAAATTATTATTAACATTA  
 CCTACCAAACTAACGCAATAACAAAACGCAAGTCATCATATACATCATTGTCATAAAAAATAAATTATGTAACCTCAAAACGAATTCAAA  
 TCGTGATCGTGAACATTTCCAAACAATTCTAGAAAAGAAAATTCGATTCCACTTTCAAATTCAAATCGTAAACATTTCCGAACAATTCTATAA  
 AAGAAAAAAAATAAGCGACCATTCCATTTTCGAACATATTTCTAATTTCTTTCAGTGTTAATTTAAATTGTATAATTTTGGCGCCAATTGCTCA  
 TGGAACCATATTTTTATTATTAATGATTATTGTGCGCAATTTTATAATCAGTTTGTCCCTGGACATGACCTATACACAATCCTACTAGGTCTC  
 ATTAATTCAGTAGCATAGAACGTTGTAGAACGCCATGGAATGTTTTGTTCCGAGGGAGTTGCCAGTCGATATTCTCGGCGGTTCTCTCGGC  
 CGTTAACCCCGATAAGGACGAACAGCTGAGCAGGGGTTCTCAAGTCGCGGTGTCAACGGGCGGCTTTTTGAATGGAACAGGTTTTTCAAT  
 GTGTAACTTGAGAACGAGTAAGTAAATCATTATTGCGAATTTTATTTTATTGAAATATGCTAATATATTTTTTTGATCTTATATTTATTGGTA  
 TACTTGGCCGATGTCACTATTTATCAGAACTATTTCTCAGTAGAATTCATATATTTAACTTATAATTTAAGAAGTAAACAACGAATTTAAAT  
 CGTAGGATAACGAAGACTAAGAACATCGCCGCTTAAATACCAAAAACAAAAAAAACCTATTTCTAAGTTACCTACTTACTTCAATAATATA  
 AATGTCAACTCTAATAACTTCATCCATTTACTTATCTTTTCTAAATTTGGAATATTTATTATCTAAAATTATAAATAAATATGAAACAAACCAC  
 ATTTTAAATCAGTAGTATAATAAAAAATACAATTGAAAAACATCAACAGCAGCAATCTGCAACATTTGCAACCCAACAGTTGAGAAGCTCTG  
 TACTATACACAAACACAAACAACAGGTACAACAGCTGACTTGTGTTTGGTTTCGAGAATTTTCTACTAGATACTAGATGGCGGTGTTGCCAAT  
 ATAAAAGGCGGCCGAGCGCGGCACGGGCATCAGTTTGA AAAACAAGCGAACAAAGTGATACAAACTTCAAGCGCTCTCAAAGCGACTCG  
 AGGATATTTCTCAGCGATTTTTGTGAAGGAAGAAAGTTGTTGTTGTTGTTAGAAATCAAGCAAA

Figure S3. Promoter sequence of SfHsp20.71 gene with potential HSEs marked. The 1783 bp nucleic acid sequence with three types of HSE elements present upstream to the ATG of SfHsp20.71 gene are shown. Two types of HSEs, tail-tail and step/gap, indicated by red and blue bold lines respectively are shown on the top of the sequence. Another type of HSE, head-head, represented by pink bold lines, is displayed below the sequence.

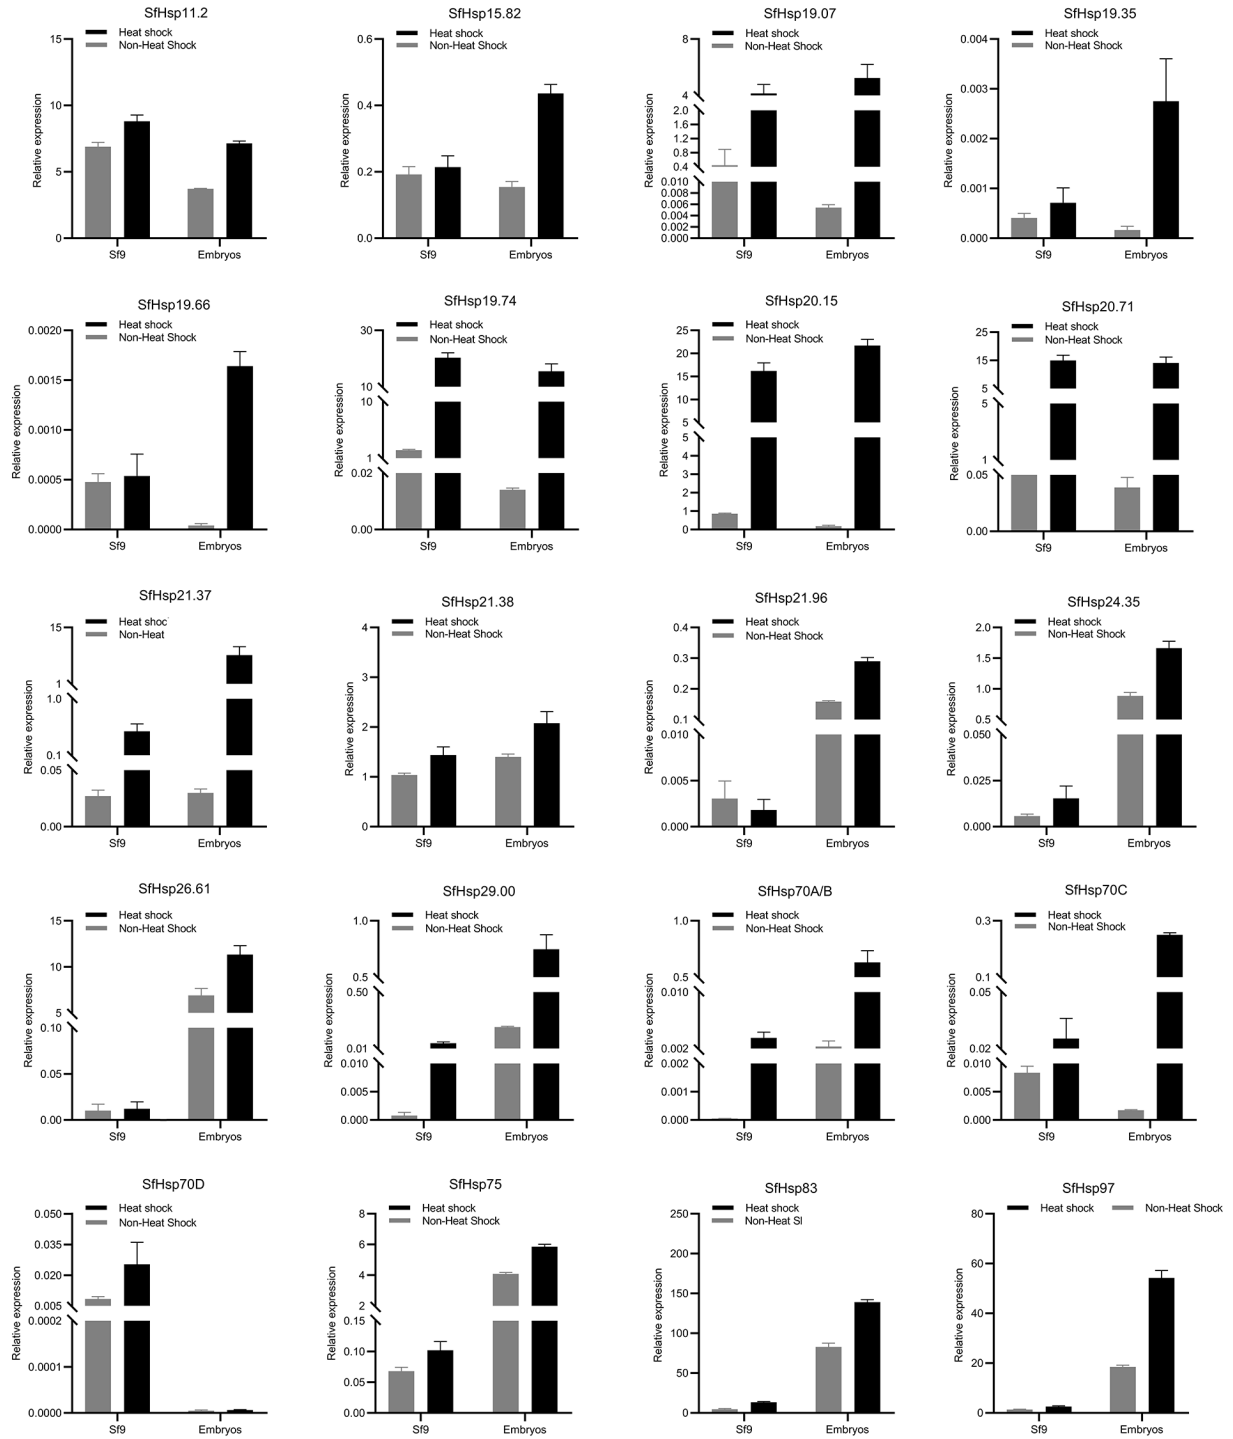

Figure S4. Relative mRNA levels of *SfHsp* genes in Sf9 cells and embryos. The Sf9 cells or embryos were exposed to 37°C for 1 hr, then let them recover at 27°C for 1 hr. Cells and fresh embryos kept at



27 °C were used as non-heat-shock control. Total RNA was isolated, converted to cDNA and used in RT-qPCR to quantify mRNA levels. 28 srRNA gene as the reference gene. Mean  $\pm$  SD (n=3) are shown.

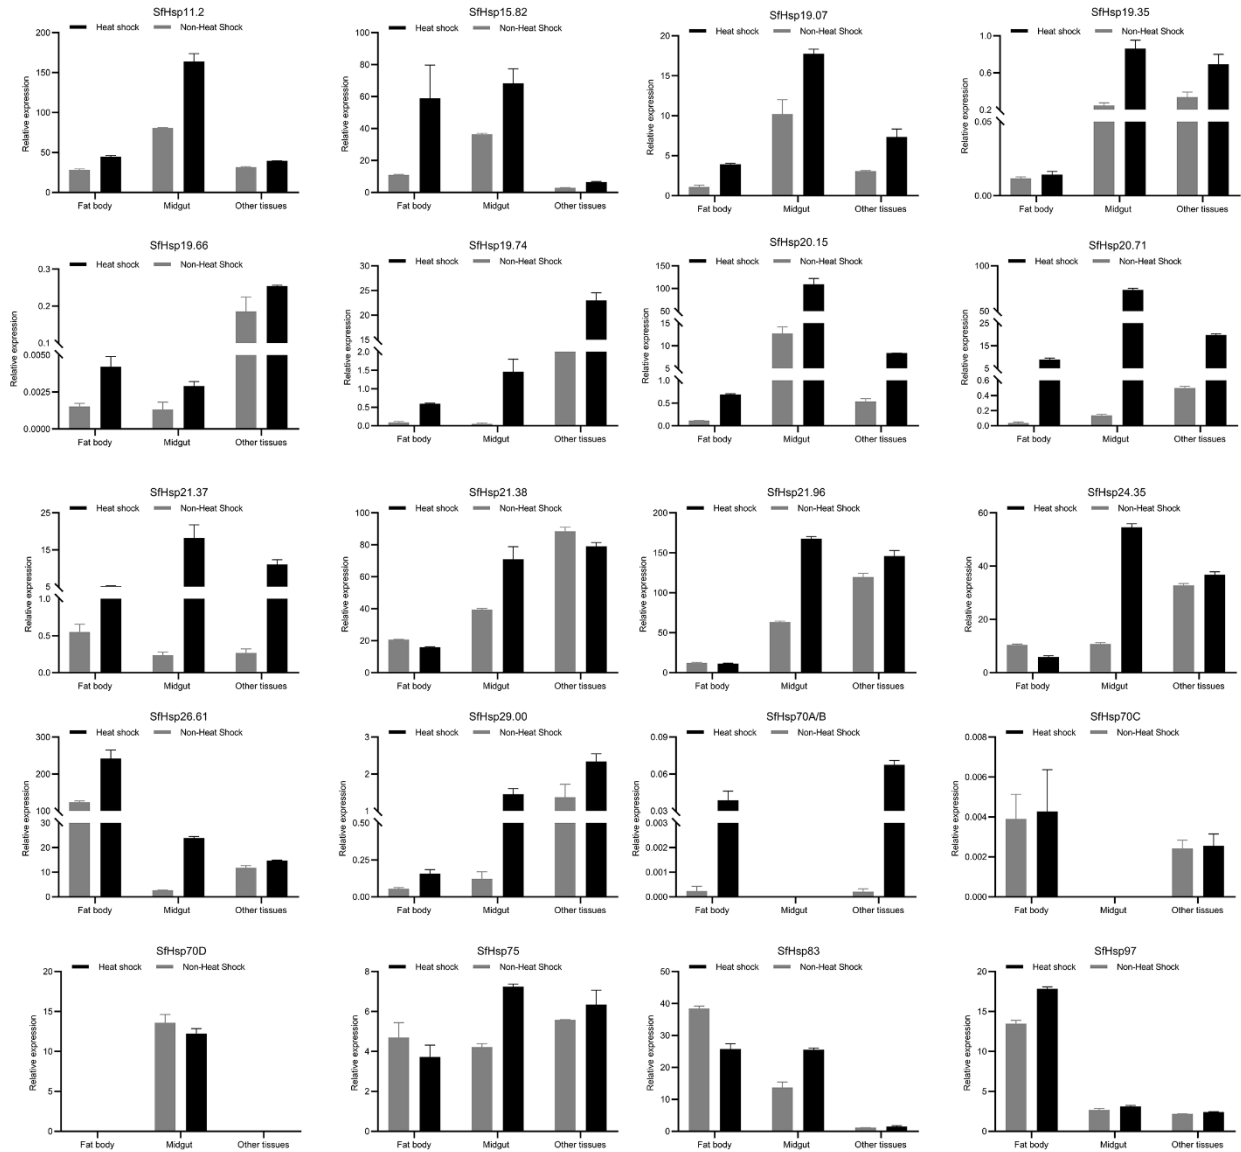

Figure S5. Relative mRNA expression levels of *SfHsp* genes in different larval tissues. The 6<sup>th</sup> instar larvae were exposed to 37 °C for 1 hr, then recovered at 27°C for 1 hr. Fat body, midgut, and remaining tissues were dissected. Tissues dissected from larvae raised at 27°C were used as non-heat-shock control. Mean  $\pm$  SD (n=3) are shown.

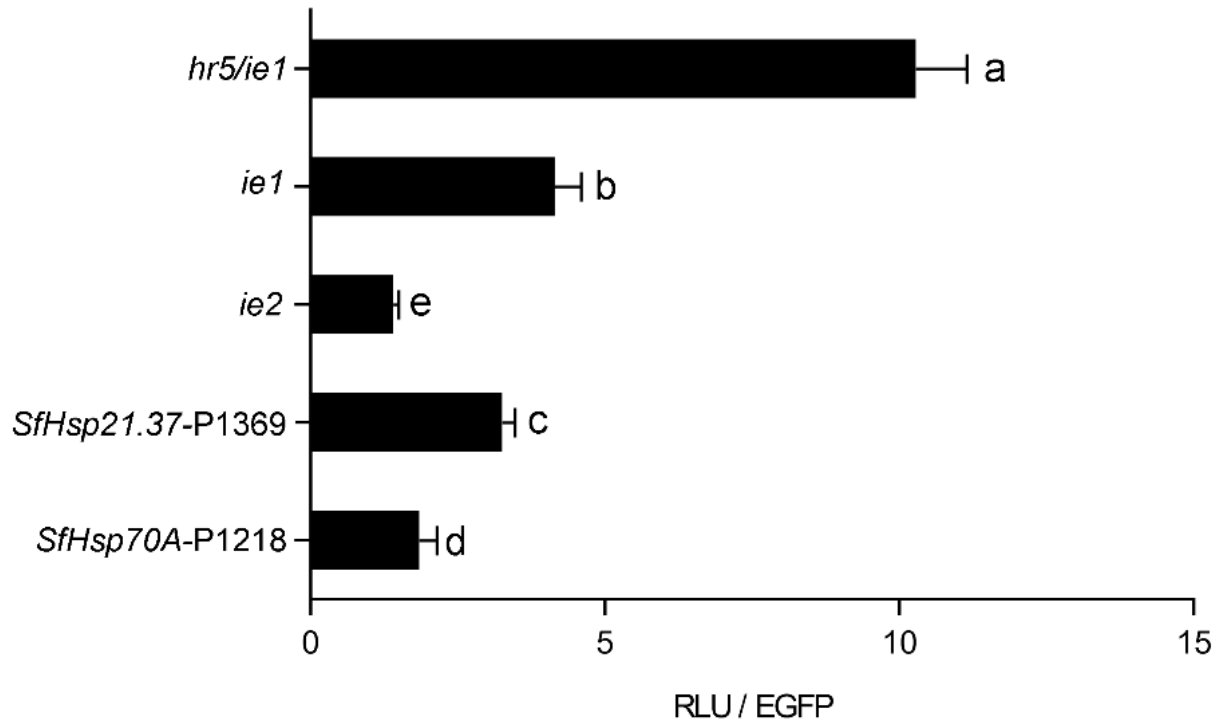

Figure S6. Comparison of highly heat-inducible *S. frugiperda* heat-shock promoters with commercially used promoters in Sf9 cells. Top two heat-shock promoter constructs that showed heat-inducible activity in Sf9 cells, and *ie1*, *ie2*, and *hr5/ie1* constructs were co-transfected into Sf9 cells with a construct expressing EGFP. The transfected cells were processed as described in Figure 4. The fluorescence intensity of EGFP in each sample was determined using SpectraMax i3x with excitation maximum of 484 nm and emission maximum of 509 nm. The luciferase activity was normalized by dividing with the EGFP activity in the same sample. Mean  $\pm$  SD (n=4) are shown. Different letters beside each column indicate significant differences ( $p < 0.05$ ) among groups determined using One-way ANOVA followed by the Tukey HSD test.
